# Supplementary material for: Oxygen vacancy mediated and enhanced metal-P bonds for stabilizing reconstruction for alkaline freshwater and seawater electrolysis
Source: Royal Society of Chemistry journal article supplement (doi:10.1039/d4ta06201a), 2024-01-01
Supplement: d4ta06201a1.pdf [file d4ta06201a1.pdf]

**Supporting Information for**  
**Oxygen Vacancies Mediated and Enhanced Metal-P Bonds for**  
**Stabilizing Reconstruction toward Alkaline Freshwater and**  
**Seawater Electrolysis**

Lei Jin, Hui Xu\*, Kun Wang, Yang Liu, Xingyue Qian, Guangyu He\*, Haiqun Chen\*

*Key Laboratory of Advanced Catalytic Materials and Technology, Advanced  
Catalysis and Green Manufacturing Collaborative Innovation Center, Changzhou  
University, Changzhou, Jiangsu Province 213164, China*

*Corresponding authors: xuhui006@cczu.edu.cn (H. Xu), hegy@cczu.edu.cn (G. He);  
chenhq@cczu.edu.cn (H. Chen)*

## 1. Material characterizations

The crystal phases and structures of the as-prepared samples were characterized by powder X-ray diffraction (XRD) with Bruker D8 Advance diffractometer (Cu K $\alpha$  radiation,  $\lambda = 0.15418$  nm) in the  $2\theta$  range of  $20$ - $80^\circ$  at a scanning rate of  $0.05^\circ$  s $^{-1}$ . The microstructures of the products were observed by transmission electron microscopy (TEM, JEM-2100F) and field-emission scanning electron microscopy (FESEM, Zeiss Supra 55) that equipped with element mappings. The morphologies of the materials were characterized by scanning electron microscopy (SEM, Zeiss Sigma 300 Cold Field scanning electron microscope). X-ray photoelectron spectroscopy (XPS, PHI-5000C ESCA, PerkinElmer, USA) was employed to obtain elemental information of prepared catalysts on a VG ESCALAB MKII using Al K $\alpha$  radiation. The Fourier transform infrared spectrometer (FT-IR, Nicolet iS5) was recorded to detect the functional groups of samples in the range of  $200$ - $2000$  cm $^{-1}$ . The electron paramagnetic resonance (EPR) spectra were recorded on a Bruker EPR ELEXSYS 500 spectrometer. The absorbance data of spectrophotometer were measured on UV-2700 spectrophotometer.

## 2. Electrochemical measurements

All the electrochemical measurements were tested using a CHI760E electrochemical workstation with a standard three electrode cell. The reference and counter electrodes were Hg/HgO and graphite rod, respectively. A glassy carbon electrode (GCE, 5 mm inner diameter,  $0.196$  cm $^2$  area) that modified with catalyst ink is used as the working electrode. The homogeneous catalyst ink was made by ultrasonically dispersing a mixture containing 2 mg of catalyst, 20  $\mu$ L Nafion (5 wt%),

360  $\mu\text{L}$  ethanol and 120  $\mu\text{L}$   $\text{H}_2\text{O}$ . Then, 13  $\mu\text{L}$  of the catalyst ink was dropped on the surface of GCE with an approximate mass loading of  $265.0 \mu\text{g}\cdot\text{cm}^{-2}$ . All potentials were measured against Hg/HgO and converted to reversible hydrogen electrode (RHE) by Nernst equation:  $E_{\text{vs RHE}} = E_{\text{vs Hg/HgO}} + 0.0591 \cdot \text{pH} + 0.098$ . The overpotential ( $\eta$ ) was calculated through the formula:  $\eta = E_{\text{RHE}} - 1.23 \text{ V}$ . Cyclic Voltammograms (CV) were measured at a scan rate of  $5 \text{ mV}\cdot\text{s}^{-1}$ . Electrochemical impedance spectroscopy was tested over the frequency range of  $10^6$  to  $10^{-2}$  Hz with an AC signal amplitude of 5 mV. The double-layer capacitance ( $C_{\text{dl}}$ ) was evaluated by cyclic voltammetry (CV) curves performed at the non-faraday reaction regions with an interval of  $20 \text{ mV}\cdot\text{s}^{-1}$  over the scanning range of  $20 \sim 120 \text{ mV}\cdot\text{s}^{-1}$ . Specifically, the electrochemical active area ECSA is calculated by the formula  $\text{ECSA} = C_{\text{dl}}/C_s$ , where  $C_{\text{dl}}$  is the electric double layer capacitance and  $C_s$  is the characteristic capacitance of the material (usually  $0.04 \text{ mF cm}^{-2}$ ). The turnover frequency (TOF) values were calculated from the following equation:  $\text{TOF} (\text{s}^{-1}) = (j \times A) / (k \times F \times n)$ . Here,  $k$  is the number of electron transfer (the factors of HER and OER are respectively 2 and 4),  $j$  is the current density at a given overpotential,  $A$  is the geometric surface area of the electrode,  $F$  is the Faraday constant ( $96485.3 \text{ C mol}^{-1}$ ),  $n$  is the number of active sites (mol). The number of voltammetric charges is gained by CV curves from  $-0.6 \sim 0 \text{ V}$  and  $0 \sim 0.6 \text{ V vs. RHE}$  for OER and HER in phosphate buffer solution ( $\text{pH} = 7$ ) with a scan rate of  $50 \text{ mV s}^{-1}$  respectively, and the following equation is  $n (\text{mol}) = Q/2F$  (the surface charge  $Q$  is proportional to the number of active sites). The long-term stability of the catalyst was conducted by chronoamperometry (CA) and chronopotentiometry (CP). All the data of

electrochemistry were presented without any iR correction.

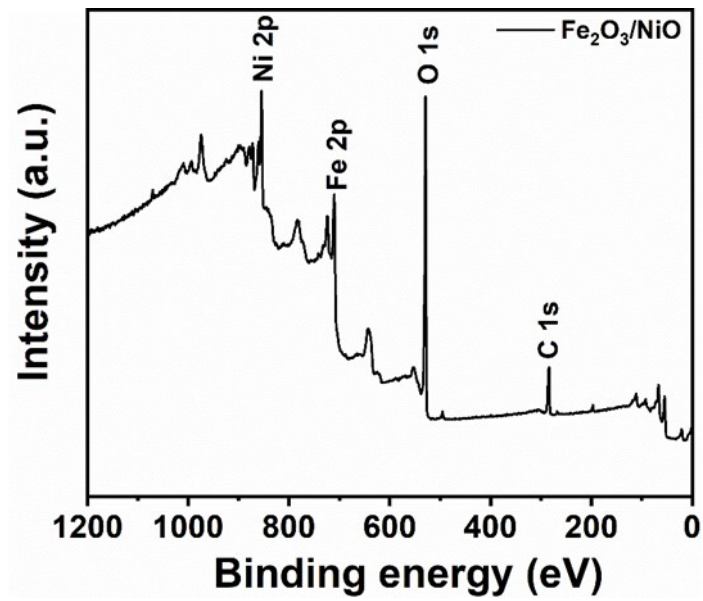

Fig. S1 XPS full spectrum of the NiO/Fe<sub>2</sub>O<sub>3</sub>.

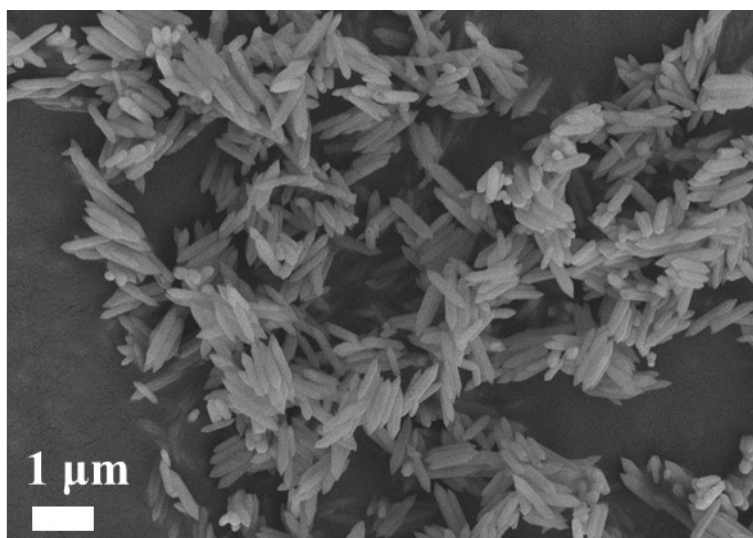

**Fig. S2** SEM image of the MIL-NiFe.

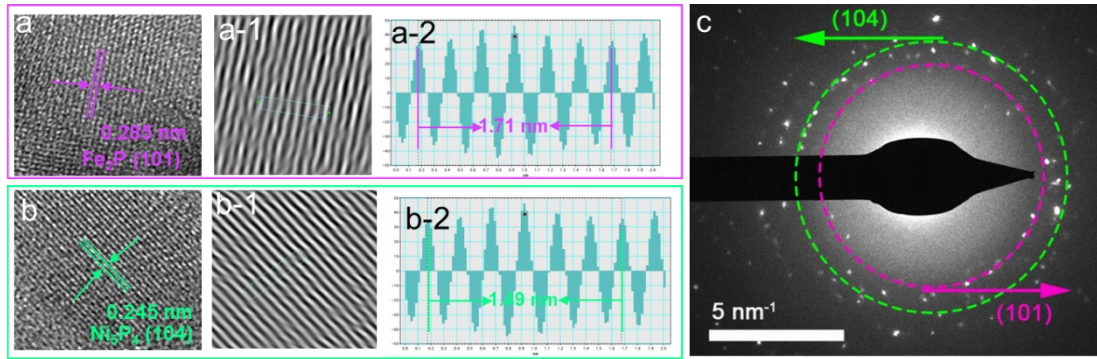

**Fig.S3** (a, b) High-resolution TEM of  $\text{Fe}_2\text{P}/\text{Ni}_5\text{P}_4$ , integrated pixel intensities (a-2 and b-2) of  $\text{Fe}_2\text{P}$  and  $\text{Ni}_5\text{P}_4$  (taken from the green dotted rectangle in (a-1) and (b-1)). (c) SAED pattern of  $\text{Fe}_2\text{P}/\text{Ni}_5\text{P}_4$ .

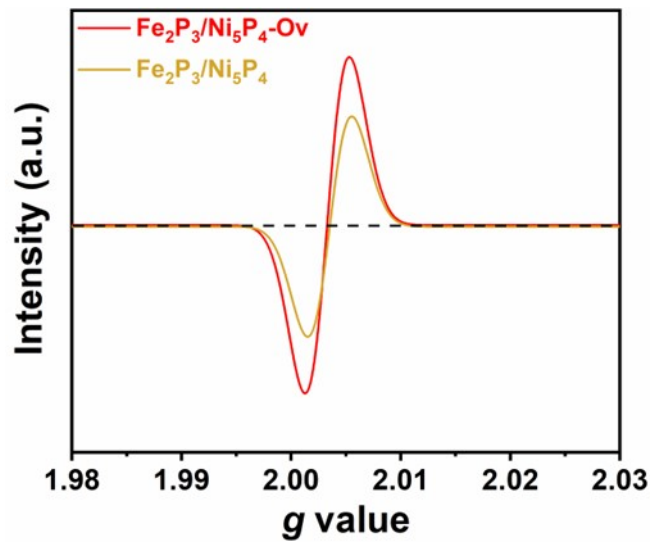

Fig. S4 EPR spectra of Fe<sub>2</sub>P/Ni<sub>5</sub>P<sub>4</sub>-Ov and Fe<sub>2</sub>P/Ni<sub>5</sub>P<sub>4</sub>.



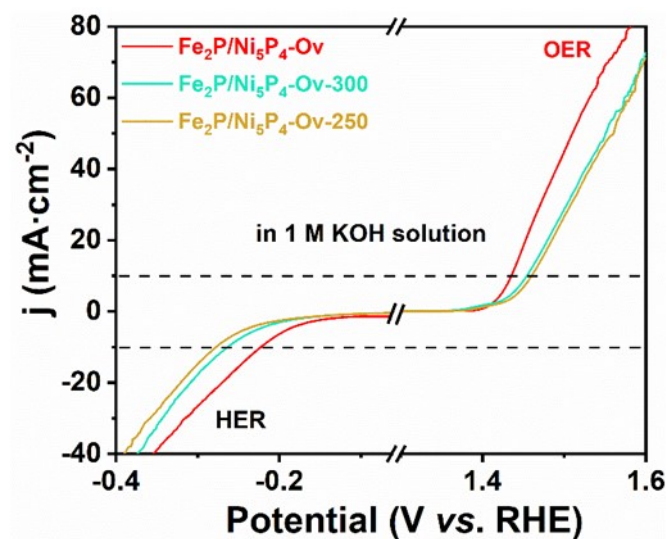

**Fig.S5** Electrocatalytic OER and HER performance of Fe<sub>2</sub>P/Ni<sub>5</sub>P<sub>4</sub>-Ov, Fe<sub>2</sub>P/Ni<sub>5</sub>P<sub>4</sub>-Ov-300 and Fe<sub>2</sub>P/Ni<sub>5</sub>P<sub>4</sub>-Ov-250 in 1 M KOH solution.

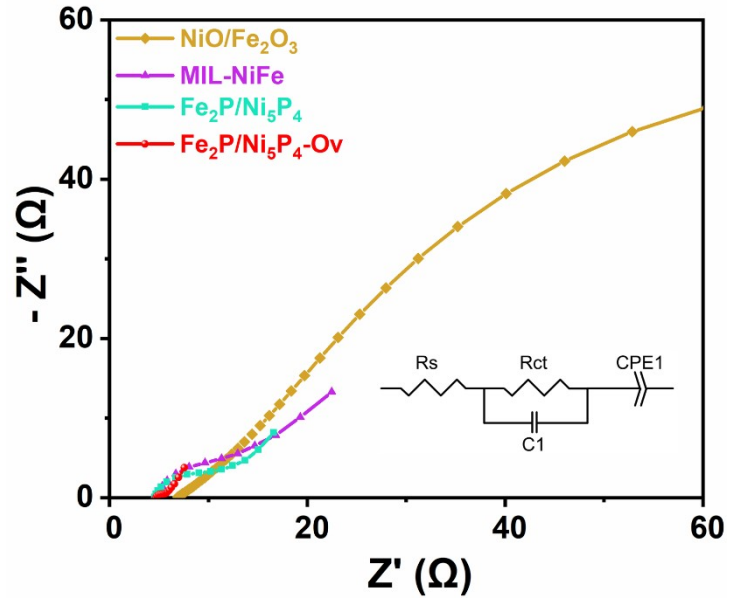

**Fig. S6** EIS curves of  $\text{Fe}_2\text{P/Ni}_5\text{P}_4\text{-Ov}$  with other samples for OER in 1.0 M KOH solution.

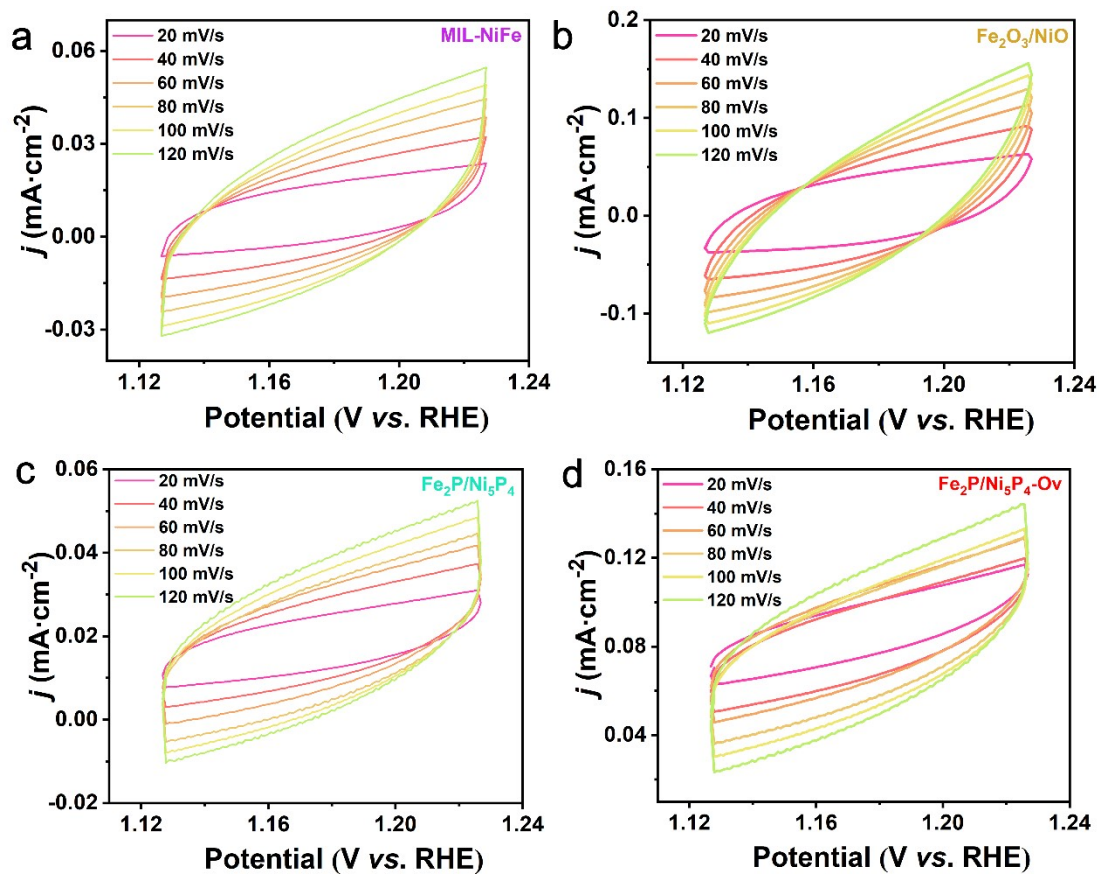

Fig. S7 CV curves of different electrocatalysts with different scanning rates for OER in 1.0 M KOH solution.

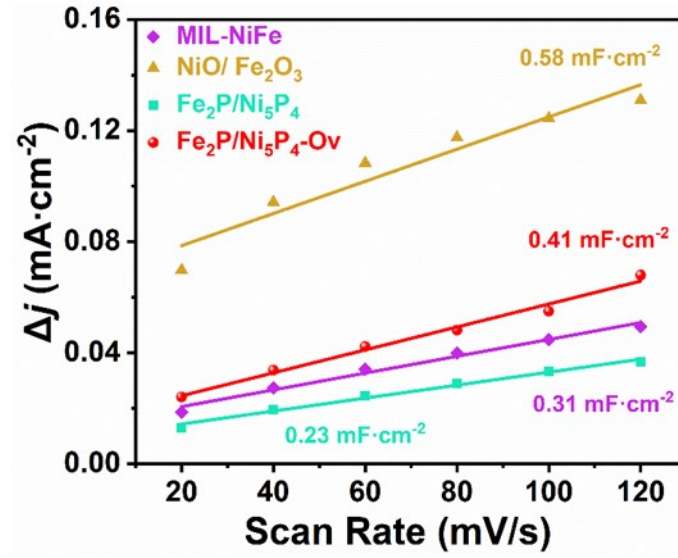

Fig. S8  $C_{dl}$  values of different catalysts for OER in 1.0 M KOH solution.

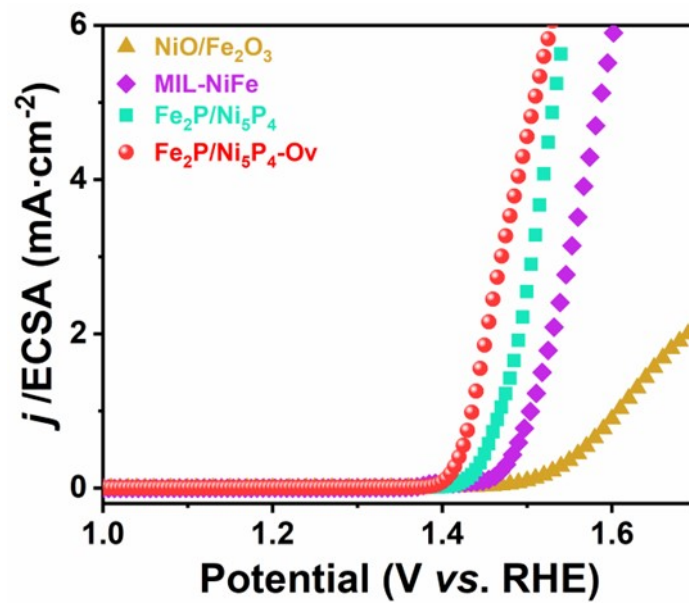

Fig. S9 LSV curves normalized to the ECSA.

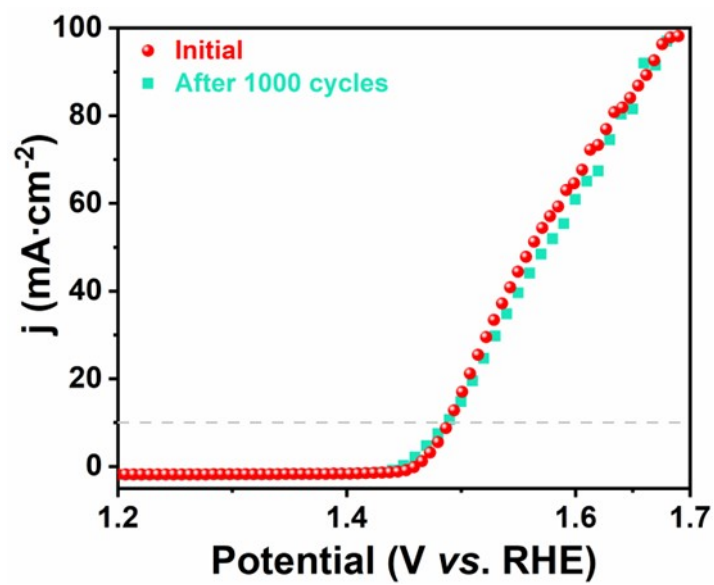

**Fig. S10** LSV curves of Fe<sub>2</sub>P/Ni<sub>5</sub>P<sub>4</sub>-Ov before and after 1000 potential CV cycles for OER.

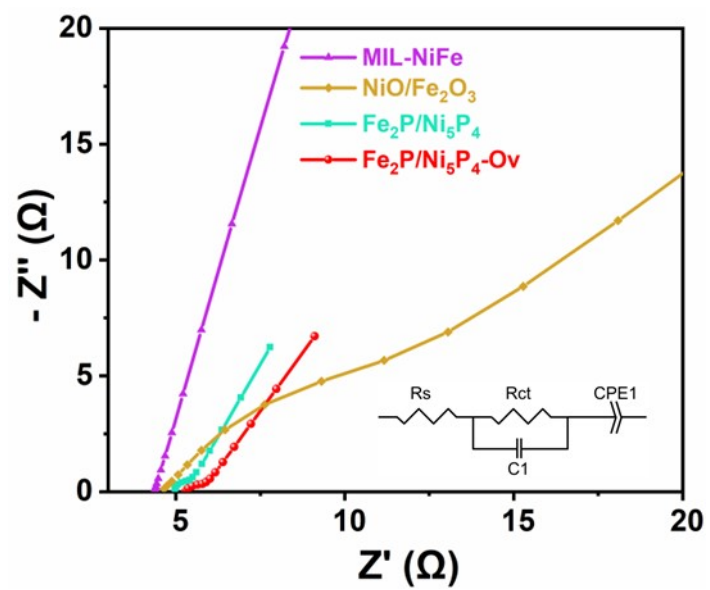

**Fig. S11** EIS curves of Fe<sub>2</sub>P/Ni<sub>5</sub>P<sub>4</sub>-Ov with other samples for HER in 1.0 M KOH solution.

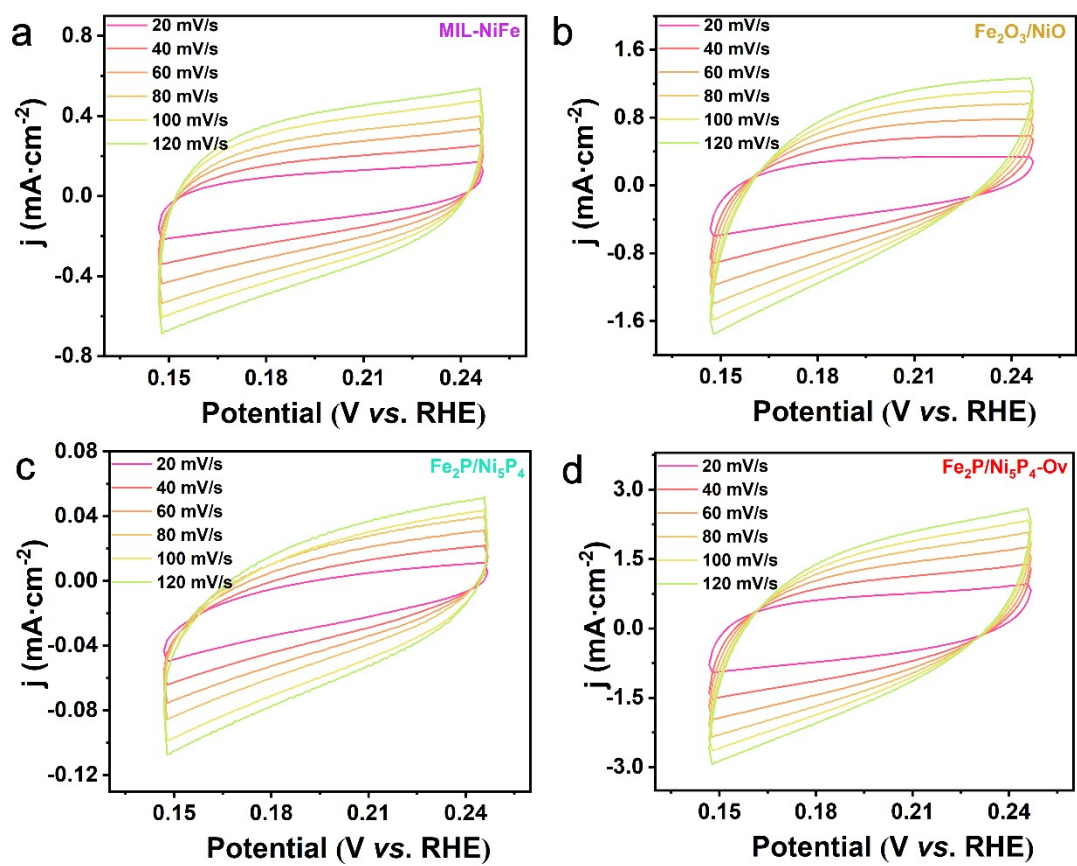

**Fig. S12** CV curves of different electrocatalysts with different scanning rates for HER in 1.0 M KOH solution.



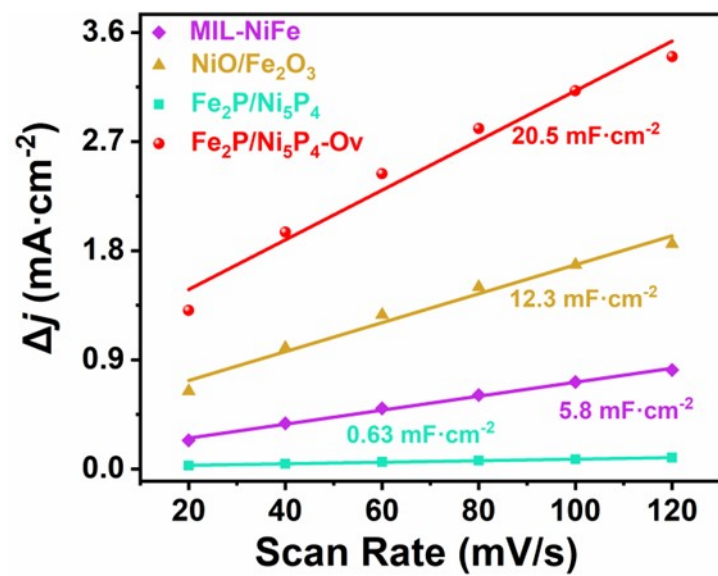

**Fig. S13**  $C_{dl}$  values of different catalysts for HER in 1.0 M KOH solution.

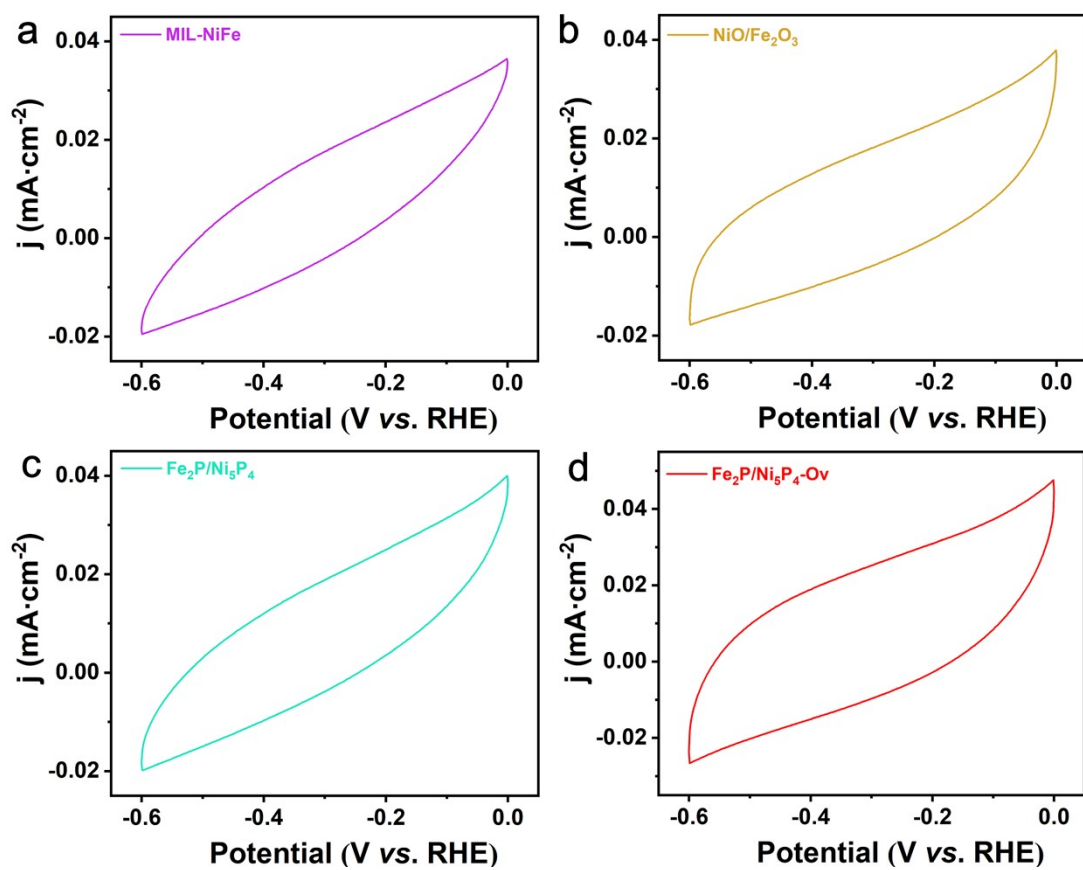

**Fig. S14** CV curves from -0.6 to 0 V vs. RHE for OER in 1.0 M PBS (pH = 7) at  $50 \text{ mV s}^{-1}$ .

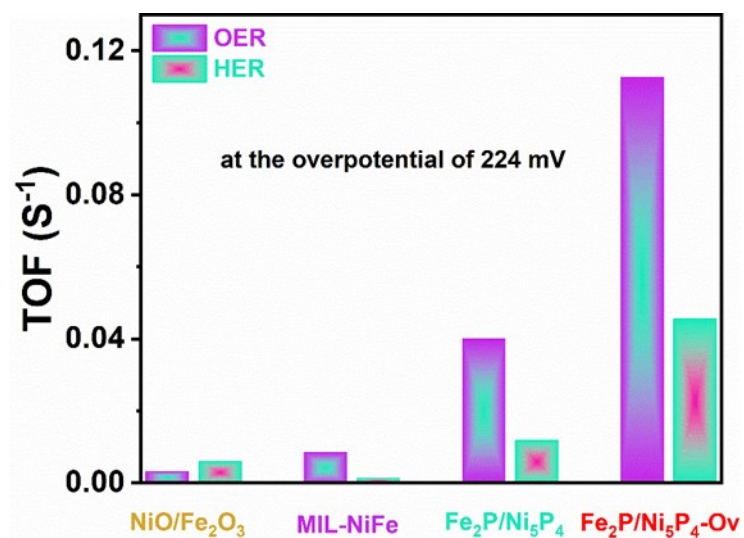

**Fig. S15** TOF values of different catalysts for OER and HER in 1.0 M KOH + freshwater solution.

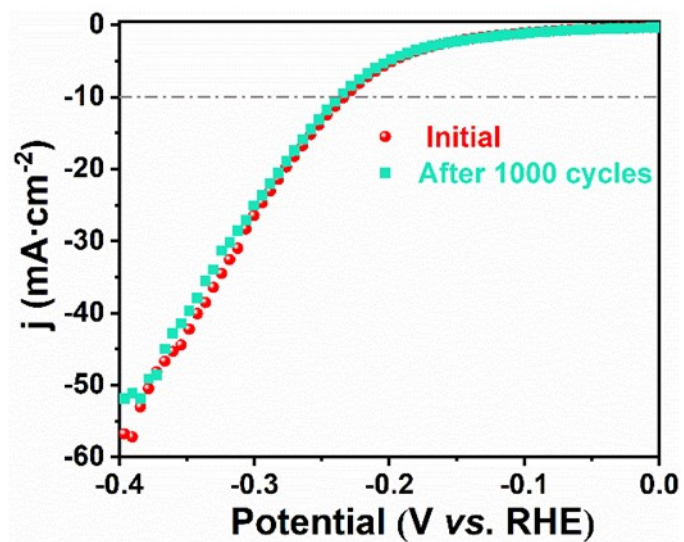

**Fig. S16** LSV curves of Fe<sub>2</sub>P/Ni<sub>5</sub>P<sub>4</sub>-Ov before and after 1000 potential CV cycles for HER.

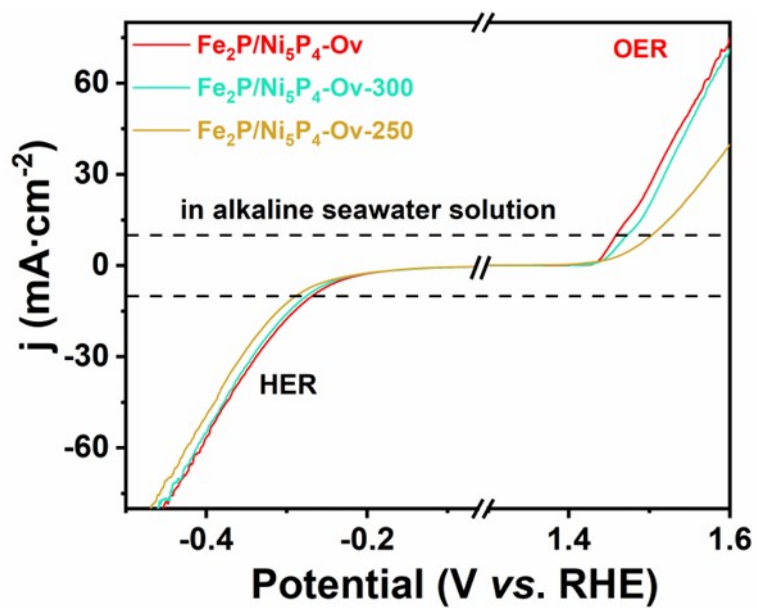

**Fig.S17** Electrocatalytic OER and HER performance of  $\text{Fe}_2\text{P}/\text{Ni}_5\text{P}_4\text{-Ov}$ ,  $\text{Fe}_2\text{P}/\text{Ni}_5\text{P}_4\text{-Ov-300}$  and  $\text{Fe}_2\text{P}/\text{Ni}_5\text{P}_4\text{-Ov-250}$  in alkaline seawater solution.

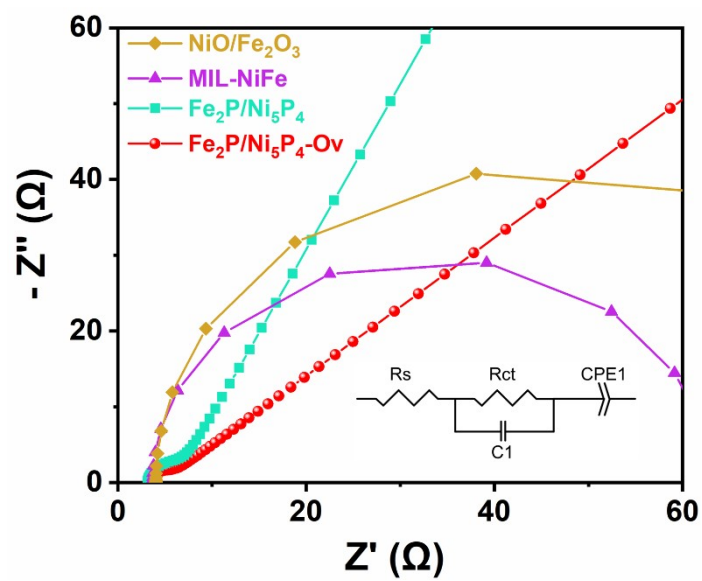

**Fig. S18** EIS curves of  $\text{Fe}_2\text{P}/\text{Ni}_5\text{P}_4\text{-Ov}$  with other samples for OER in 1.0 M KOH + seawater solution.

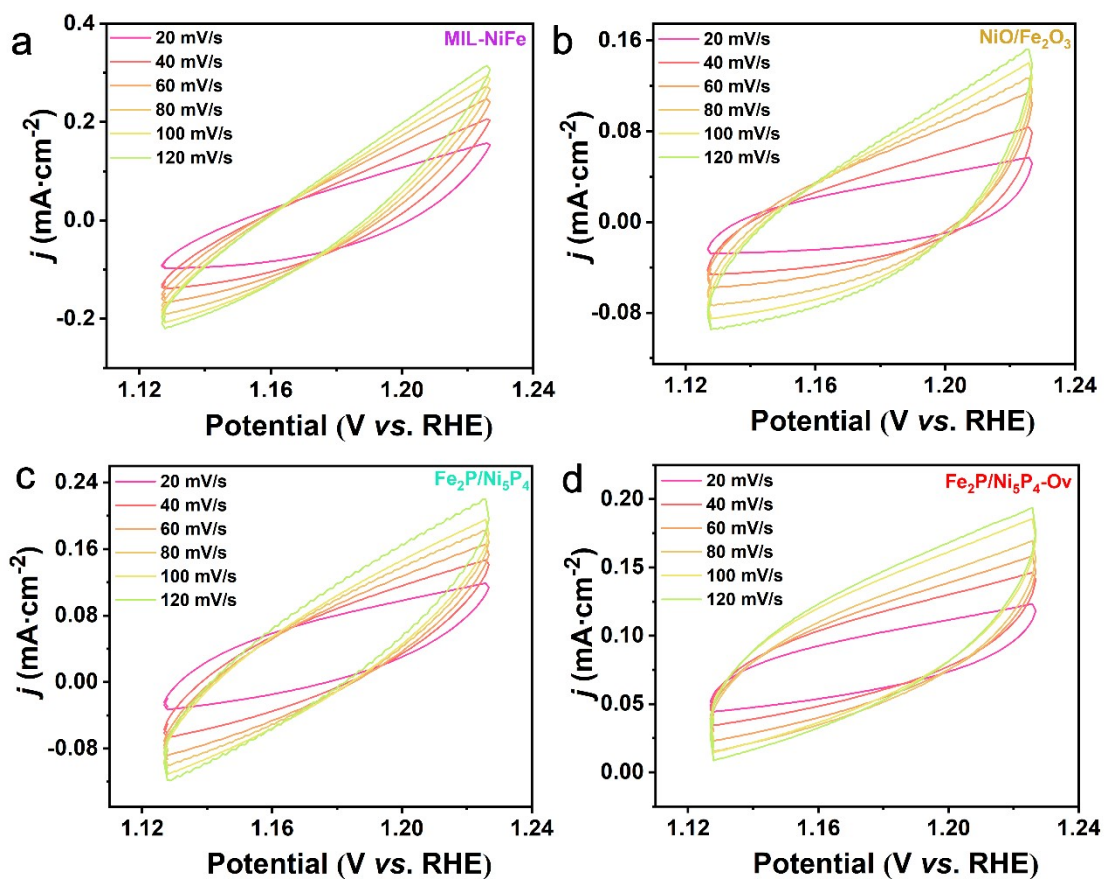

**Fig. S19** CV curves of different electrocatalysts with different scanning rates for OER in 1.0 M KOH + seawater solution.

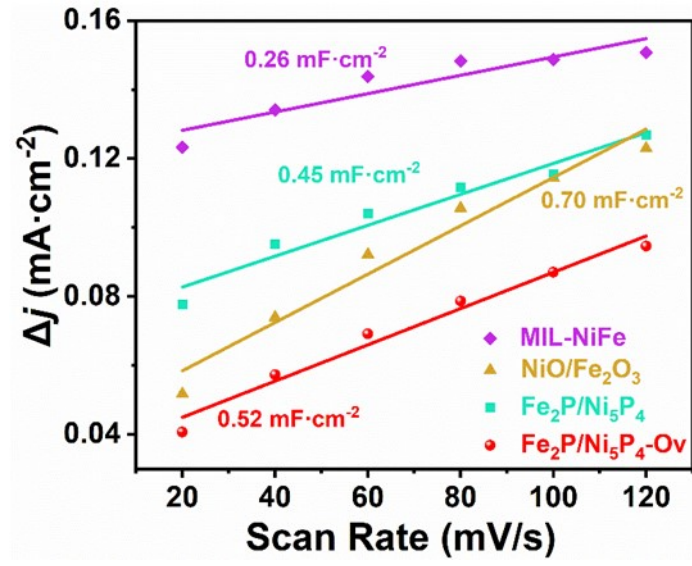

**Fig. S20**  $C_{dl}$  values of different catalysts for OER in 1.0 M KOH + seawater solution.



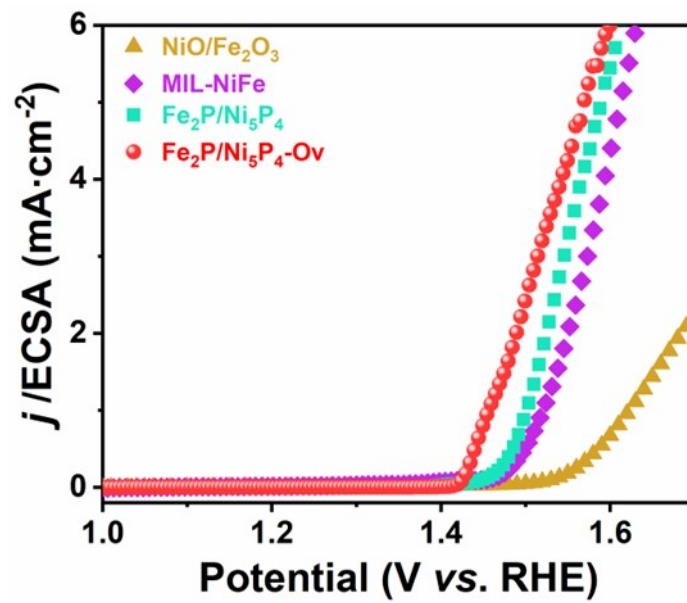

Fig. S21 LSV curves normalized to the ECSA.

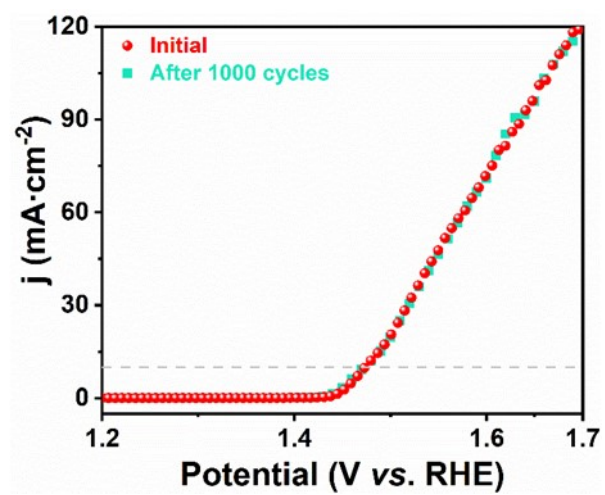

**Fig. S22** LSV curves of Fe<sub>2</sub>P/Ni<sub>3</sub>P<sub>4</sub>-Ov before and after 1000 potential CV cycles for OER.

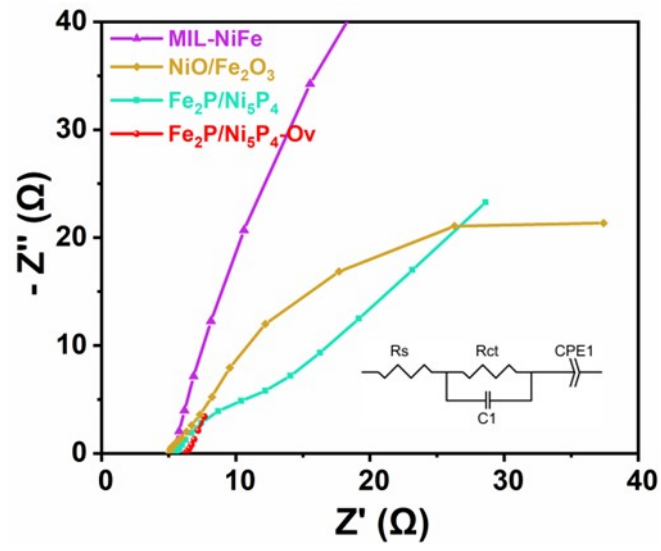

**Fig. S23** EIS curves of Fe<sub>2</sub>P/Ni<sub>5</sub>P<sub>4</sub>-Ov with other samples for HER in 1.0 M KOH+ seawater solution.

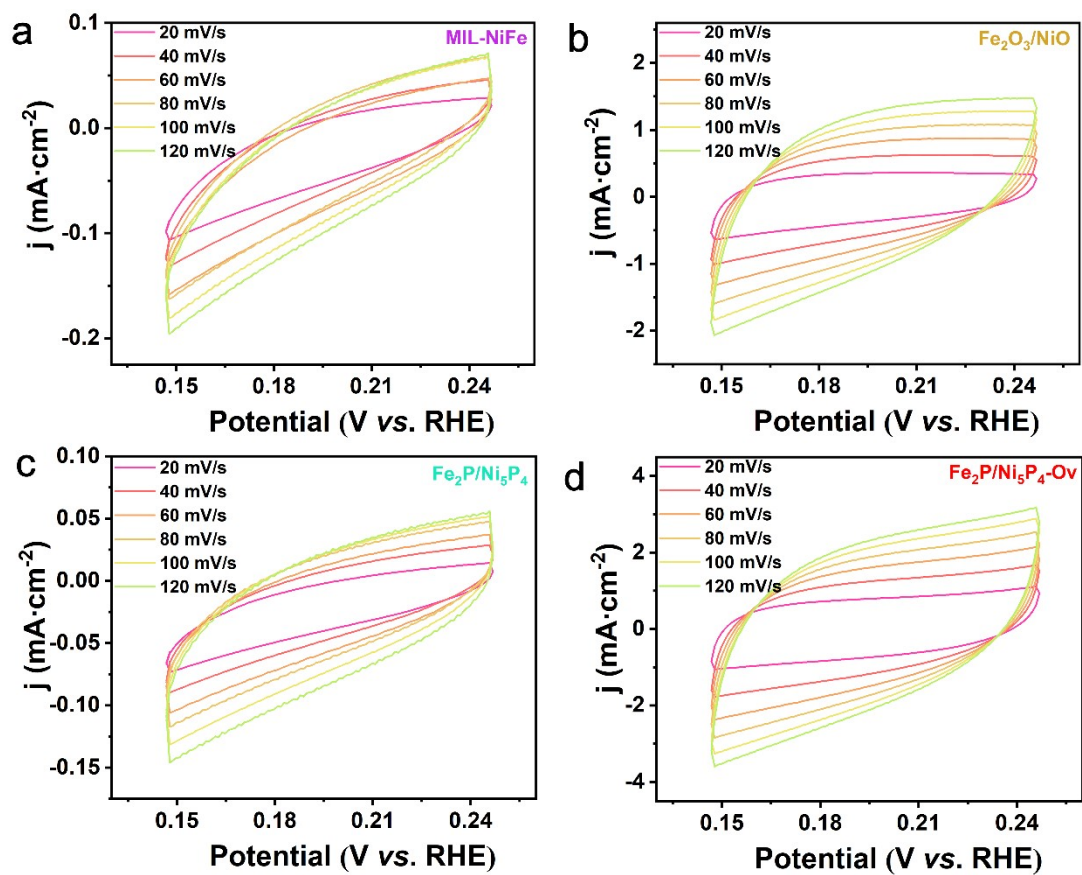

**Fig. S24** CV curves of different electrocatalysts with different scanning rates for HER in 1.0 M KOH + seawater solution.

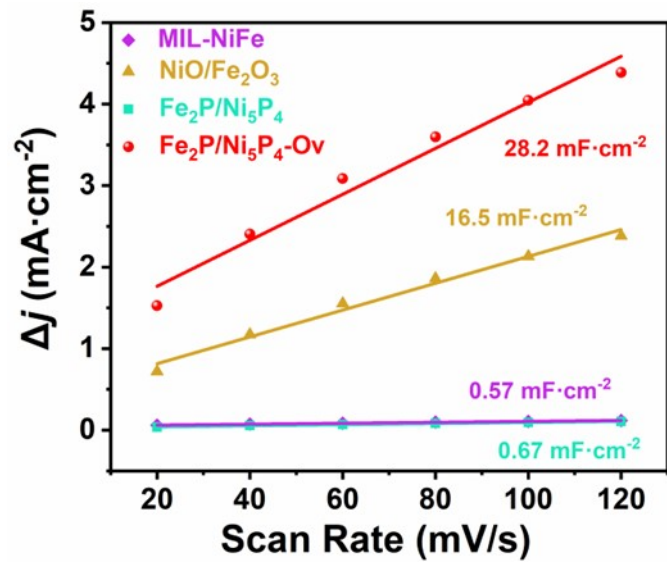

**Fig. S25**  $C_{dl}$  values of different catalysts for HER in 1.0 M KOH + seawater solution.

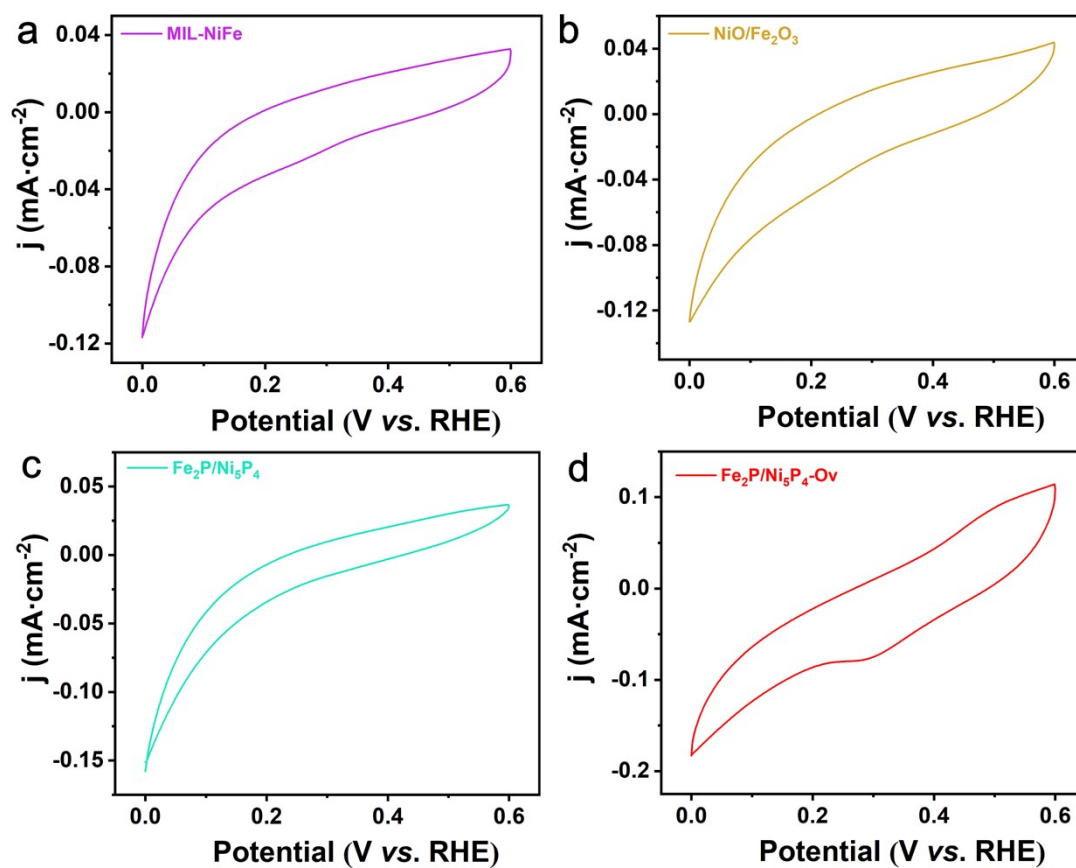

Fig. S26 CV curves from 0 to 0.6 V vs. RHE for HER in 1.0 M PBS (pH = 7) at 50  $\text{mV s}^{-1}$ .

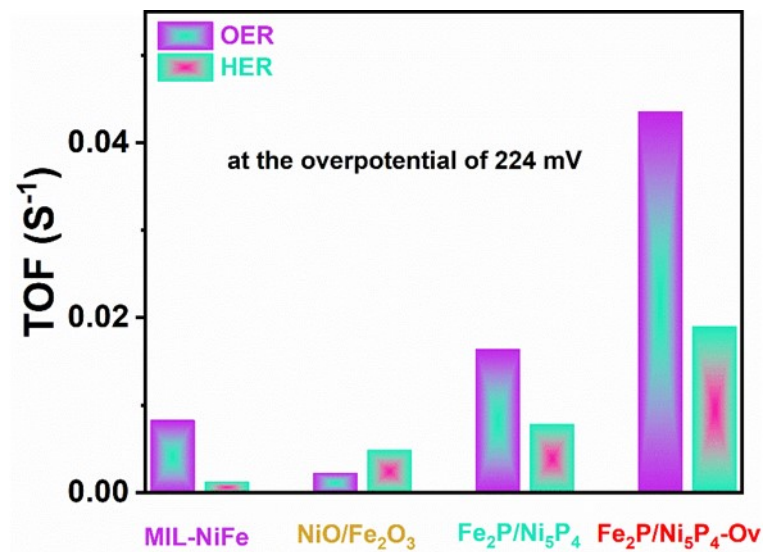

**Fig. S27** TOF values of different catalysts for OER and HER in 1.0 M KOH + seawater solution.

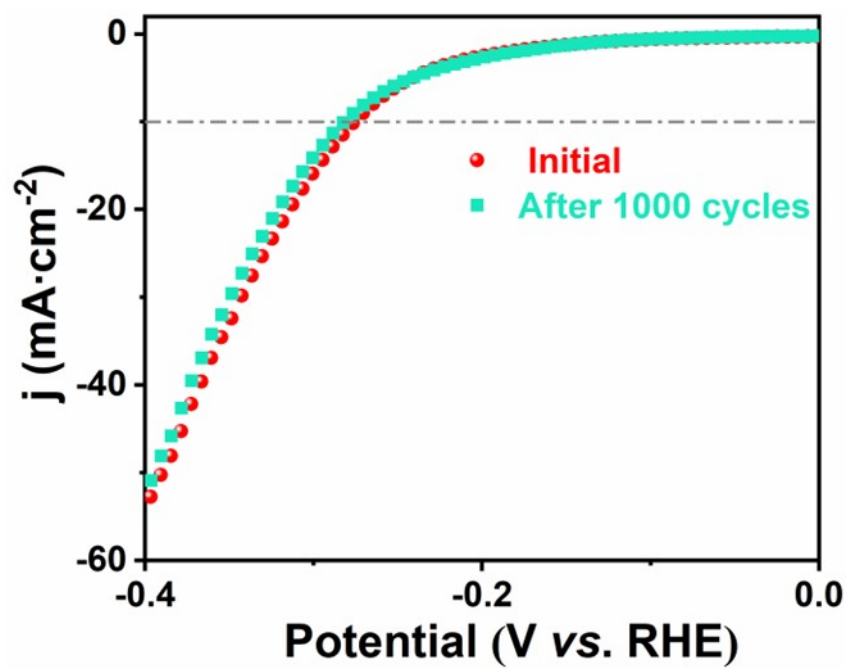

**Fig. S28** LSV curves of Fe<sub>2</sub>P/Ni<sub>5</sub>P<sub>4</sub>-Ov before and after 1000 potential CV cycles for HER.



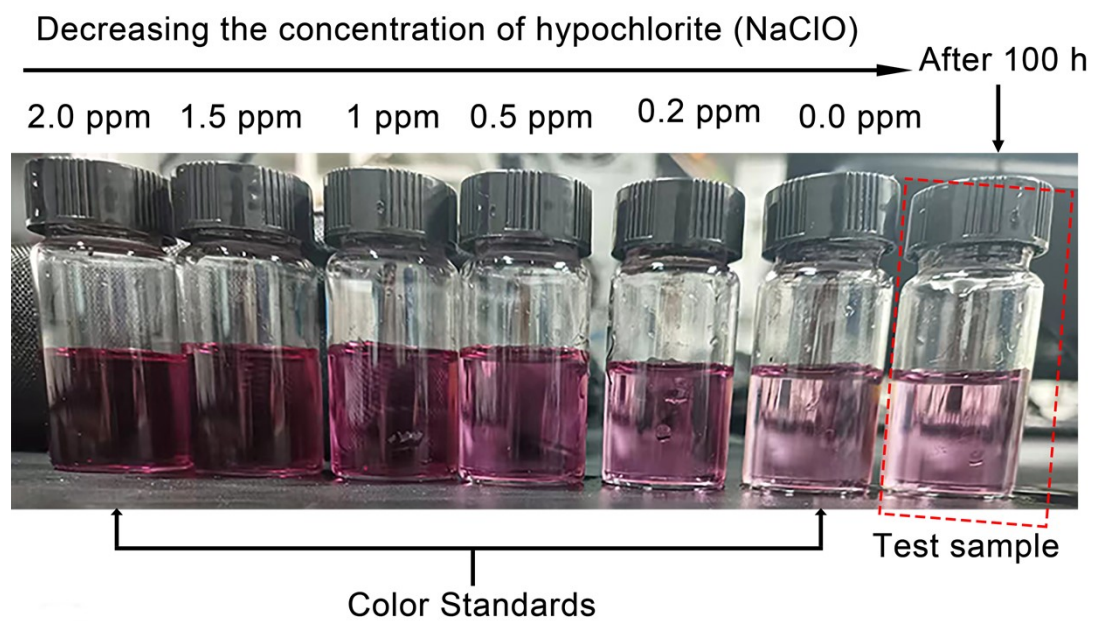

**Fig. S29** Hypochlorite detection result with different NaClO contents and the electrolyte after 100 h electrolysis for  $\text{Fe}_2\text{P}/\text{Ni}_5\text{P}_4\text{-Ov}$  at a constant current density of  $10 \text{ mA cm}^{-2}$  in 1 M KOH + seawater.

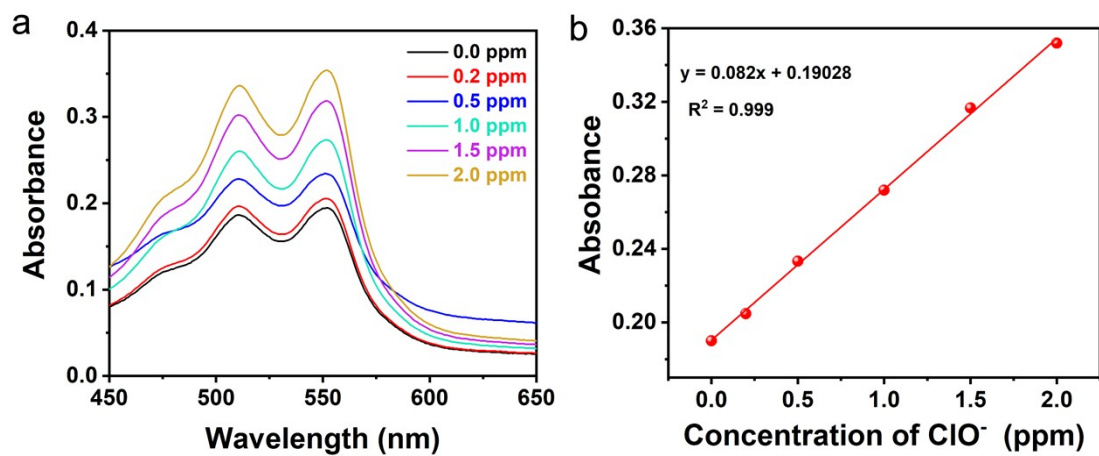

**Fig. S30** (a) UV-Vis absorption spectra of ClO<sup>-</sup> with different concentrations. (b) Calibration curve used for calculating ClO<sup>-</sup> concentrations of the electrolyte.

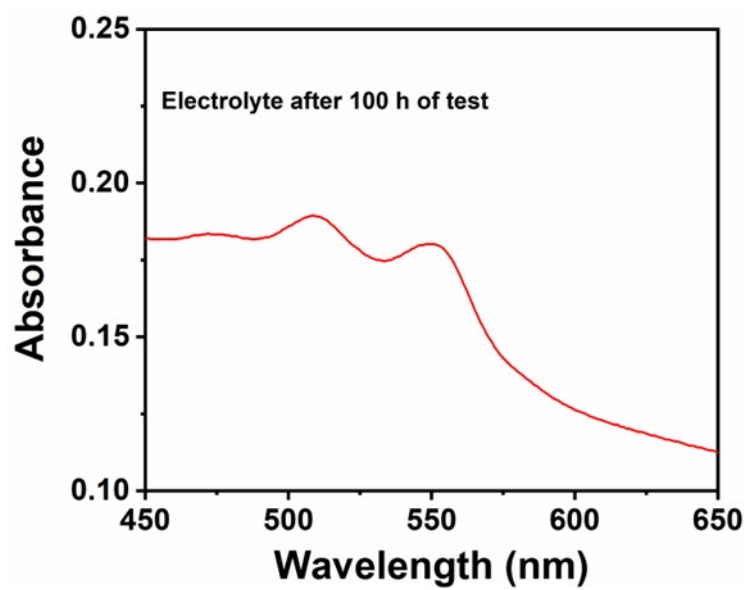

**Fig. S31** UV/Vis absorption spectrum of the electrolyte after 100 h electrolysis for  $\text{Fe}_2\text{P}/\text{Ni}_5\text{P}_4\text{-Ov}$  at a constant current density of  $10 \text{ mA cm}^{-2}$  in 1 M KOH + seawater.

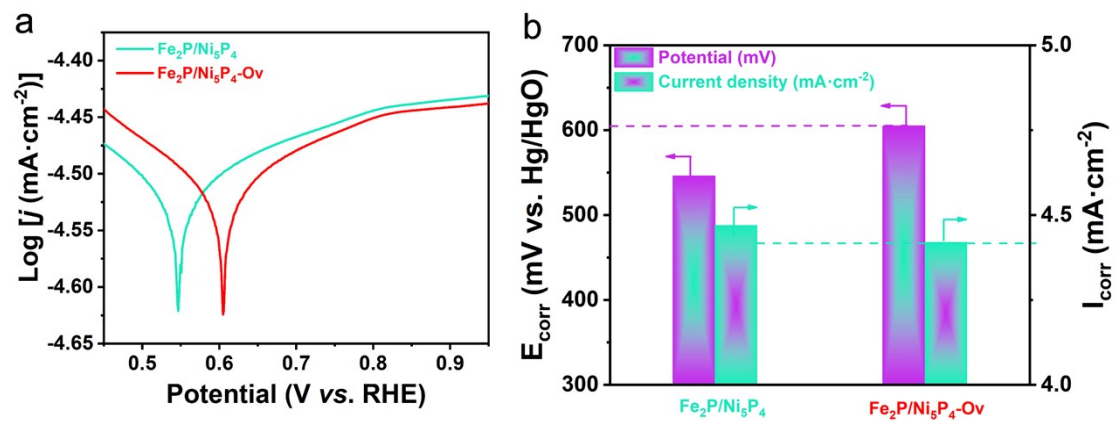

**Fig. S32** (a) Polarization curves for corresponding electrodes after OCP test. (b) comparison of  $E_{\text{corr}}$  and  $I_{\text{corr}}$  on  $\text{Fe}_2\text{P/Ni}_5\text{P}_4$  and  $\text{Fe}_2\text{P/Ni}_5\text{P}_4\text{-Ov}$ .

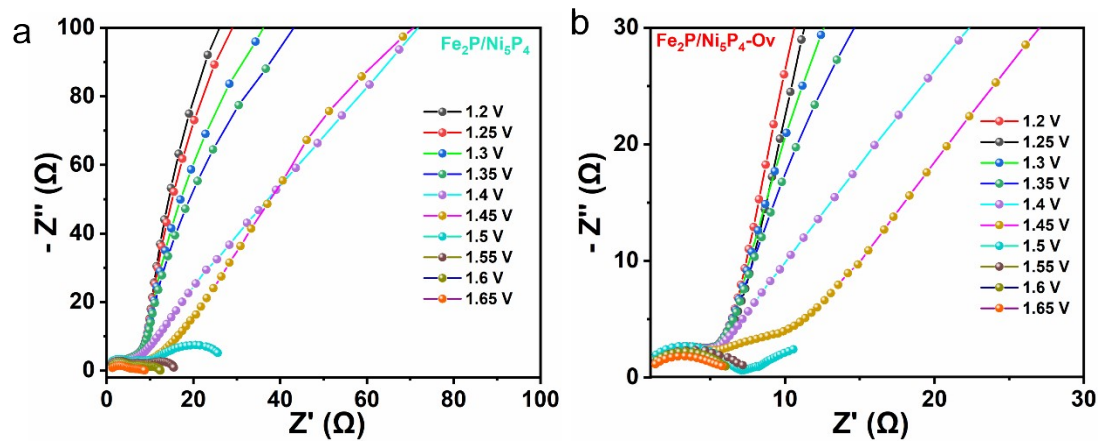

**Fig. S33** Nyquist plots for (a)  $\text{Fe}_2\text{P}/\text{Ni}_5\text{P}_4$  and (b)  $\text{Fe}_2\text{P}/\text{Ni}_5\text{P}_4\text{-Ov}$  at different applied potentials vs RHE in 1 M KOH solution.

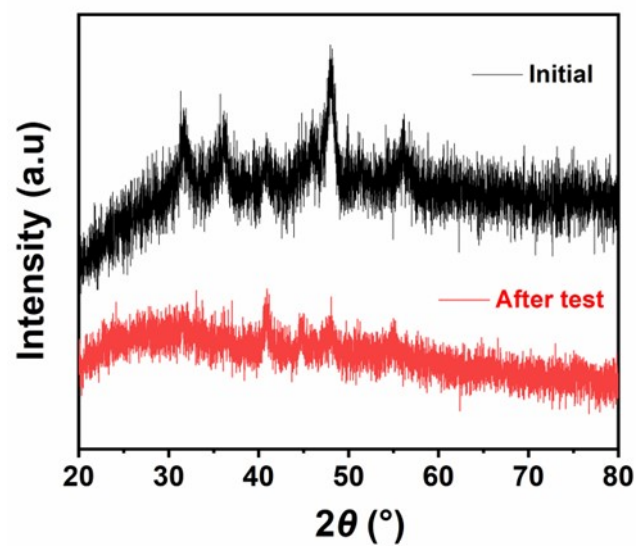

**Fig. S34** XRD pattern of the Fe<sub>2</sub>P/Ni<sub>5</sub>P<sub>4</sub>-Ov catalyst before and after the OER test.

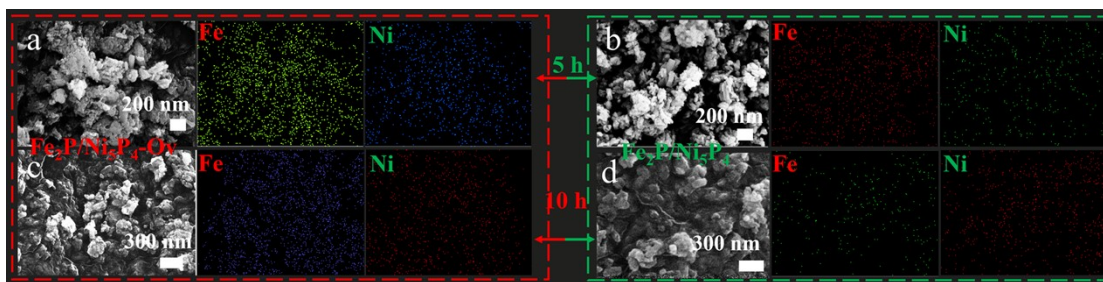

**Fig. S35** (a, b) EDX elemental mappings of  $\text{Fe}_2\text{P}/\text{Ni}_5\text{P}_4\text{-Ov}$  and  $\text{Fe}_2\text{P}/\text{Ni}_5\text{P}_4$  catalysts that cycled for 5 h, respectively. (c, d) EDX elemental mappings of  $\text{Fe}_2\text{P}/\text{Ni}_5\text{P}_4\text{-Ov}$  and  $\text{Fe}_2\text{P}/\text{Ni}_5\text{P}_4$  catalysts that cycled for 10 h, respectively

**Table S1.** Comparison of OER performance with other electrocatalysts 1.0 M KOH solution.

| Catalysts                                             | Overpotential<br>(mV) | Current density<br>(mA cm <sup>-2</sup> ) | Ref              |
|-------------------------------------------------------|-----------------------|-------------------------------------------|------------------|
| <b>Fe<sub>2</sub>P/Ni<sub>5</sub>P<sub>4</sub>-Ov</b> | <b>205</b>            | <b>10</b>                                 | <b>This work</b> |
| CoP <sub>2</sub> /NC-1                                | 290                   | 10                                        | 1                |
| Ir@Zr-CoP                                             | 292                   | 10                                        | 2                |
| Ru-MoCoP                                              | 240                   | 10                                        | 3                |
| Ni <sub>2</sub> P/Ni <sub>5</sub> P <sub>4</sub>      | 286                   | 10                                        | 4                |
| CoP@CNF                                               | 300                   | 10                                        | 5                |
| CoP/NiCoP                                             | 310.7                 | 10                                        | 6                |
| CoP/Mo <sub>2</sub> CT <sub>x</sub>                   | 312                   | 10                                        | 7                |
| Ru-RuP <sub>x</sub> Co <sub>x</sub> P                 | 338                   | 10                                        | 8                |
| Fe-Co-P                                               | 340                   | 10                                        | 9                |
| Mn-CoP-2                                              | 344                   | 10                                        | 10               |
| V-CoP                                                 | 420                   | 10                                        | 11               |



**Table S2.** List of resistance values calculated from electrical impedance spectra of NiO/Fe<sub>2</sub>O<sub>3</sub>, MIL-NiFe, Fe<sub>2</sub>P/Ni<sub>5</sub>P<sub>4</sub> and Fe<sub>2</sub>P/Ni<sub>5</sub>P<sub>4</sub>-Ov for OER in 1.0 M KOH solution. (R<sub>s</sub>: Electrolyte resistance; R<sub>ct</sub>: Charge transfer resistance).

| <b>Materials</b>                                     | <b>R<sub>s</sub> (ohm)</b> | <b>R<sub>ct</sub> (ohm)</b> |
|------------------------------------------------------|----------------------------|-----------------------------|
| Fe <sub>2</sub> P/Ni <sub>5</sub> P <sub>4</sub> -Ov | 4.762                      | 1.02                        |
| Fe <sub>2</sub> P/Ni <sub>5</sub> P <sub>4</sub>     | 4.824                      | 6.4                         |
| MIL-NiFe                                             | 1.23                       | 15.7                        |
| NiO/Fe <sub>2</sub> O <sub>3</sub>                   | 5.0                        | 48.6                        |

**Table S3.** List of resistance values calculated from electrical impedance spectra of NiO/Fe<sub>2</sub>O<sub>3</sub>, MIL-NiFe, Fe<sub>2</sub>P/Ni<sub>5</sub>P<sub>4</sub> and Fe<sub>2</sub>P/Ni<sub>5</sub>P<sub>4</sub>-Ov for HER in 1.0 M KOH solution. (R<sub>s</sub>: Electrolyte resistance; R<sub>ct</sub>: Charge transfer resistance).

| <b>Materials</b>                                     | <b>R<sub>s</sub> (ohm)</b> | <b>R<sub>ct</sub> (ohm)</b> |
|------------------------------------------------------|----------------------------|-----------------------------|
| Fe <sub>2</sub> P/Ni <sub>5</sub> P <sub>4</sub> -Ov | 4.656                      | 0.37                        |
| Fe <sub>2</sub> P/Ni <sub>5</sub> P <sub>4</sub>     | 4.683                      | 0.46                        |
| MIL-NiFe                                             | 7.52                       | 94.5                        |
| NiO/Fe <sub>2</sub> O <sub>3</sub>                   | 4.9                        | 3.1                         |

**Table S4.** List of resistance values calculated from electrical impedance spectra of NiO/Fe<sub>2</sub>O<sub>3</sub>, MIL-NiFe, Fe<sub>2</sub>P/Ni<sub>5</sub>P<sub>4</sub> and Fe<sub>2</sub>P/Ni<sub>5</sub>P<sub>4</sub>-Ov for OER in alkaline seawater solution. (R<sub>s</sub>: Electrolyte resistance; R<sub>ct</sub>: Charge transfer resistance).

| <b>Materials</b>                                     | <b>R<sub>s</sub> (ohm)</b> | <b>R<sub>ct</sub> (ohm)</b> |
|------------------------------------------------------|----------------------------|-----------------------------|
| Fe <sub>2</sub> P/Ni <sub>5</sub> P <sub>4</sub> -Ov | 3.109                      | 1.5                         |
| Fe <sub>2</sub> P/Ni <sub>5</sub> P <sub>4</sub>     | 3.129                      | 2.9                         |
| MIL-NiFe                                             | 3.859                      | 36.2                        |
| NiO/Fe <sub>2</sub> O <sub>3</sub>                   | 3.71                       | 46.7                        |

**Table S5.** List of resistance values calculated from electrical impedance spectra of NiO/Fe<sub>2</sub>O<sub>3</sub>, MIL-NiFe, Fe<sub>2</sub>P/Ni<sub>5</sub>P<sub>4</sub> and Fe<sub>2</sub>P/Ni<sub>5</sub>P<sub>4</sub>-Ov for HER in alkaline seawater solution. (R<sub>s</sub>: Electrolyte resistance; R<sub>ct</sub>: Charge transfer resistance).

| <b>Materials</b>                                     | <b>R<sub>s</sub> (ohm)</b> | <b>R<sub>ct</sub> (ohm)</b> |
|------------------------------------------------------|----------------------------|-----------------------------|
| Fe <sub>2</sub> P/Ni <sub>5</sub> P <sub>4</sub> -Ov | 4.461                      | 0.19                        |
| Fe <sub>2</sub> P/Ni <sub>5</sub> P <sub>4</sub>     | 4.48                       | 3.2                         |
| MIL-NiFe                                             | 4.79                       | 107.3                       |
| NiO/Fe <sub>2</sub> O <sub>3</sub>                   | 4.6                        | 26.1                        |

**Table S6** Comparison of OER performance in alkaline seawater solution for Fe<sub>2</sub>P/Ni<sub>5</sub>P<sub>4</sub>-Ov with some representative non-precious metal catalysts reported.

| Catalysts                                             | Overpotential<br>(mV) | Current density<br>(mA cm <sup>-2</sup> ) | Tafels slope<br>(mV/dec) | Ref.             |
|-------------------------------------------------------|-----------------------|-------------------------------------------|--------------------------|------------------|
| <b>Fe<sub>2</sub>P/Ni<sub>5</sub>P<sub>4</sub>-Ov</b> | <b>229</b>            | <b>10</b>                                 | <b>56.3</b>              | <b>This work</b> |
| Fe <sub>2</sub> P-NiCoP                               | 258                   | 10                                        | 49                       | 12               |
| FCNP@CQs                                              | 268                   | 10                                        | 45.2                     | 13               |
| CoSe <sub>2</sub> -NCF                                | 245                   | 10                                        | 93                       | 14               |
| Er-MoO <sub>2</sub>                                   | 312                   | 10                                        | 99                       | 15               |
| ER-SNCF-20s                                           | 278                   | 10                                        | 57                       | 16               |
| Fe <sub>2</sub> P-NiCoP                               | 245                   | 10                                        | 82.5                     | 17               |
| NiMoSe@CC                                             | 360                   | 10                                        | —                        | 18               |
| Co <sub>2</sub> P/CoMoP <sub>2</sub>                  | 268                   | 10                                        | 81                       | 19               |

## References

1. Chen, Y.; Yang, Z.; Wang, J.; Yang, Y.; He, X.; Wang, Y.; Chen, J.; Guo, Y.; Wang, X.; Wang, S., *Nano Res.*, 2023, **17**, 1-9.
2. Ngo, Q. P.; Nguyen, T. T.; Le, Q. T. T.; Lee, J. H.; Kim, N. H., *Adv. Energy Mater.*, 2023, **13** (44), 2301841.
3. Bi, M.; Zhang, Y.; Jiang, X.; Sun, J.; Wang, X.; Zhu, J.; Fu, Y., *Adv. Energy Mater.*, 2024, **34** (2), 2309330.
4. Lyu, C.; Cao, C.; Cheng, J.; Yang, Y.; Wu, K.; Wu, J.; Lau, W.-M.; Qian, P.; Wang, N.; Zheng, J., *Chem. Eng. J.*, 2023, **464**, 142538.
5. Ren, A.; Yu, B.; Huang, M.; Liu, Z., *Int. J. Hydrogen Energy*, 2024, **51**, 490-502.
6. Fu, X.; Zhang, Z.; Zheng, Y.; Lu, J.; Cheng, S.; Su, J.; Wei, H.; Gao, Y., *J. Colloid Interf. Sci.*, 2024, **653**, 1272-1282.
7. Liu, S.; Lin, Z.; Wan, R.; Liu, Y.; Liu, Z.; Zhang, S.; Zhang, X.; Tang, Z.; Lu, X.; Tian, Y., *J. Mater. Chem. A*, 2021, **9** (37), 21259-21269.
8. Wang, L.; Zhou, Q.; Pu, Z.; Zhang, Q.; Mu, X.; Jing, H.; Liu, S.; Chen, C.; Mu, S., *Nano Energy*, 2018, **53**, 270-276.
9. Liu, K.; Zhang, C.; Sun, Y.; Zhang, G.; Shen, X.; Zou, F.; Zhang, H.; Wu, Z.; Wegener, E. C.; Taubert, C. J., *ACS Nano*, 2018, **12** (1), 158-167.
10. Liu, Y.; Ran, N.; Ge, R.; Liu, J.; Li, W.; Chen, Y.; Feng, L.; Che, R., *Chem. Eng. J.*, 2021, **425**, 131642.
11. Zhang, R.; Wei, Z.; Ye, G.; Chen, G.; Miao, J.; Zhou, X.; Zhu, X.; Cao, X.; Sun, X., *Adv. Energy Mater.*, 2021, **11** (38), 2101758.

12. Xiao, M.; Zhang, C.; Wang, P.; Zeng, W.; Zhu, J.; Li, Y.; Peng, W.; Liu, Q.; Xu, H.; Zhao, Y., *Mater. Today Phys.*, 2022, **24**, 100684.
13. Lv, S.; Deng, Y.; Liu, Q.; Fu, Z.; Liu, X.; Wang, M.; Xiao, Z.; Li, B.; Wang, L., *Appl. Catal. B: Environ. Energy*, 2023, **326**, 122403.
14. Chen, H.; Zhang, S.; Liu, Q.; Yu, P.; Luo, J.; Hu, G.; Liu, X., *Inorg. Chem. Commun.*, 2022, **146**, 110170.
15. Yang, T.; Lv, H.; Quan, Q.; Li, X.; Lu, H.; Cui, X.; Liu, G.; Jiang, L., *Appl. Surf. Sci.*, 2023, **615**, 156360.
16. Hu, R.; Zhao, M.; Miao, H.; Liu, F.; Zou, J.; Zhang, C.; Wang, Q.; Tian, Z.; Zhang, Q.; Yuan, J., *Nanoscale*, 2022, **14** (28), 10118-10124.
17. Jin, L.; Xu, H.; Wang, K.; Yang, L.; Liu, Y.; Qian, X.; He, G.; Chen, H., *Appl. Surf. Sci.*, 2024, **657**, 159777.
18. Saquib, M.; Arora, P.; Bhosale, A. C., *Fuel*, 2024, **365**, 131251.
19. Sun, B.; Li, C.; Yang, J.; Bai, H.; Meng, X., *Inorg. Chem. Front.*, 2024, **11**, 1978-1992.
